# Supplementary material for: Covalent bond formation via a [2+2] cycloaddition reaction as a tool to alter thermal expansion parameters of organic co-crystals
Source: Royal Society of Chemistry journal article supplement (doi:10.1039/c8nj03815e), 2018-01-01
Supplement: c8nj03815e1.pdf [file c8nj03815e1.pdf]

Supporting Information

for

**Covalent bond formation via a [2+2] cycloaddition reaction as a tool  
to alter thermal expansion parameters of organic co-crystals**

Kristin M. Hutchins,<sup>\*a</sup> Daniel K. Unruh,<sup>a</sup> and Ryan H. Groeneman<sup>\*b</sup>

<sup>a</sup>Department of Chemistry & Biochemistry, Texas Tech University, 1204 Boston Avenue,  
Lubbock, TX 79409, USA.

<sup>b</sup>Department of Biological Sciences, Webster University, 470 E. Lockwood Ave., St. Louis, MO,  
63119, USA.

|                                                                    |          |
|--------------------------------------------------------------------|----------|
| 1. Materials and Synthesis of the Photoproduct Co-crystals         | Page 2   |
| 2. <sup>1</sup> H NMR Spectrum of the Photoproduct                 | Page 3   |
| 3. X-ray Diffraction Information and Data Tables                   | Page 4-6 |
| 4. Thermal Expansion Data and Intermolecular Interaction Distances | Page 7   |

## 1. Materials and Synthesis of the Photoproduct Co-crystal

### *Materials*

Resorcinol (**res**), *trans*-1,2-bis(4-pyridyl)ethylene (**4,4'-BPE**), and ethanol (95% pure) were all purchased from Sigma–Aldrich Chemical (St. Louis, MO, USA) and were used as received.

### *Preparation of the Photoproduct Co-crystal*

The synthesis and photoreactivity of the co-crystal 2(**res**)•2(**4,4'-BPE**) has been previously reported.<sup>1</sup> In the present study, 50 mg of **4,4'-BPE** was dissolved in 3 mL of ethanol and was combined with a second 2 mL ethanol solution of 30 mg of **res** (1:1 molar ratio). Within one day, crystals suitable for X-ray diffraction were realized. The crystals were crushed between two glass plates and placed in a photoreactor containing a 450 W medium pressure mercury light bulb. The sample was exposed to 50 hours of UV light to achieve a quantitative yield for the photoreaction as determined by <sup>1</sup>H NMR spectroscopy (Figure S1).

## 2. $^1\text{H}$ NMR Spectrum of the Photoproduct

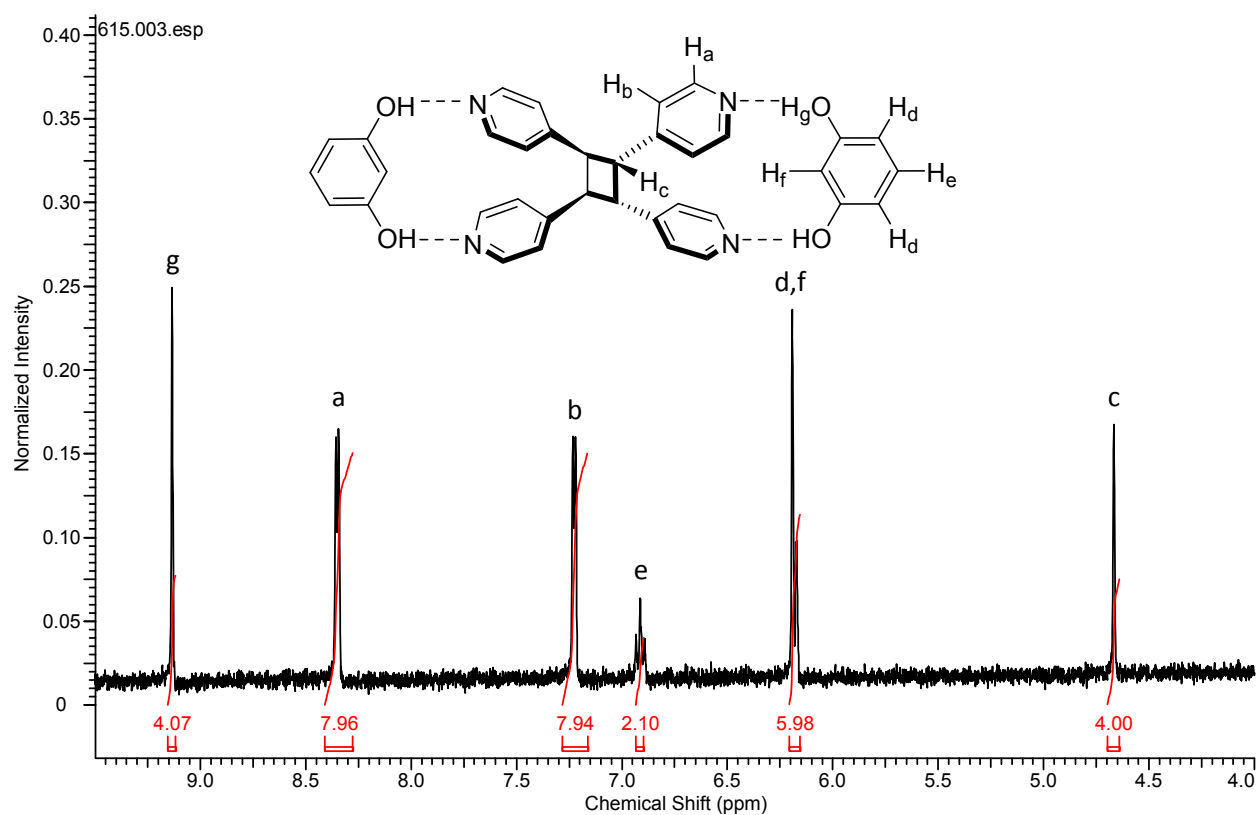

**Figure S1.**  $^1\text{H}$  NMR spectrum of  $2(\text{res})\cdot(\text{TPCB})$  following 50 hours of UV irradiation indicating a quantitative yield for the [2+2] cycloaddition reaction (400 MHz,  $\text{DMSO}-d_6$ ).

### 3. X-ray Diffraction Information and Data Tables

A suitable single crystal of  $2(\text{res})\cdot(\text{TPCB})$  was secured to Mitegen magnetic mount using Paratone oil and was placed on Bruker APEX II Kappa Diffractometer equipped with an Oxford Cryostream low temperature device using Mo  $K_{\alpha}$  radiation ( $\lambda = 0.71073 \text{ \AA}$ ). All of the diffraction data was collected on the same crystal. Data collection strategies to ensure maximum data redundancy and completeness were calculated using Apex II. Data collection, initial indexing, frame integration, Lorentz-polarization corrections and final cell parameter calculations were carried out again using Apex II. Multi-scan absorption corrections were performed using *SADABS*.<sup>2</sup> The *SHELXL-2014*<sup>3</sup>, series of programs were used for the solution and refinement of the crystal structure. All non-hydrogen atoms were refined anisotropically and hydrogen atoms bound to carbon atoms were located in the difference Fourier map and were geometrically constrained using the appropriate AFIX commands. Crystallographic and refinement data for  $2(\text{res})\cdot(\text{TPCB})$  at each temperature is summarized in Table S1.

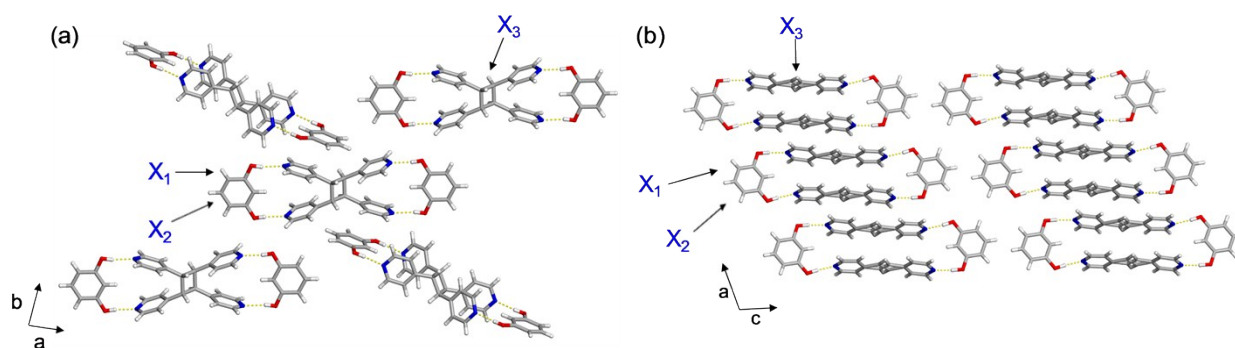

**Figure S2.** X-ray crystal structures of: (a)  $2(\text{res})\cdot(\text{TPCB})$  and (b)  $2(\text{res})\cdot 2(4,4'\text{-BPE})_4$  highlighting  $X_1$ ,  $X_2$ , and  $X_3$  axes. The O-H...N hydrogen bonds are shown with yellow dotted lines.

**Table S1.** X-ray crystallographic and refinement data for 2(res)•(TPCB) at various temperatures.

|                                            |                                                               |                                                               |                                                               |
|--------------------------------------------|---------------------------------------------------------------|---------------------------------------------------------------|---------------------------------------------------------------|
| compound formula                           | C <sub>36</sub> H <sub>32</sub> N <sub>4</sub> O <sub>4</sub> | C <sub>36</sub> H <sub>32</sub> N <sub>4</sub> O <sub>4</sub> | C <sub>36</sub> H <sub>32</sub> N <sub>4</sub> O <sub>4</sub> |
| formula mass                               | 584.65                                                        | 584.65                                                        | 584.65                                                        |
| crystal system                             | monoclinic                                                    | monoclinic                                                    | monoclinic                                                    |
| space group                                | P2 <sub>1</sub> /n                                            | P2 <sub>1</sub> /n                                            | P2 <sub>1</sub> /n                                            |
| a/Å                                        | 11.3117(10)                                                   | 11.3142(10)                                                   | 11.3139(9)                                                    |
| b/Å                                        | 9.8022(5)                                                     | 9.7891(6)                                                     | 9.7762(5)                                                     |
| c/Å                                        | 14.2920(13)                                                   | 14.2833(13)                                                   | 14.2685(12)                                                   |
| α/°                                        | 90                                                            | 90                                                            | 90                                                            |
| β/°                                        | 111.539(4)                                                    | 111.607(4)                                                    | 111.658(4)                                                    |
| γ/°                                        | 90                                                            | 90                                                            | 90                                                            |
| V/Å <sup>3</sup>                           | 1474.0(2)                                                     | 1470.8(2)                                                     | 1466.78(19)                                                   |
| ρ <sub>calc</sub> /g cm <sup>-3</sup>      | 1.317                                                         | 1.320                                                         | 1.324                                                         |
| T/K                                        | 290                                                           | 270                                                           | 250                                                           |
| Z                                          | 2                                                             | 2                                                             | 2                                                             |
| radiation type                             | Mo Kα                                                         | Mo Kα                                                         | Mo Kα                                                         |
| absorption coefficient, μ/mm <sup>-1</sup> | 0.087                                                         | 0.087                                                         | 0.088                                                         |
| no. of reflections measured                | 7800                                                          | 7746                                                          | 7726                                                          |
| no. of independent reflections             | 3395                                                          | 3381                                                          | 3383                                                          |
| no of reflection (I > 2σ(I))               | 1634                                                          | 2035                                                          | 2088                                                          |
| R <sub>int</sub>                           | 0.0506                                                        | 0.392                                                         | 0.0380                                                        |
| R <sub>1</sub> (I > 2σ(I))                 | 0.0425                                                        | 0.0499                                                        | 0.0486                                                        |
| wR(F <sup>2</sup> ) (I > 2σ(I))            | 0.0737                                                        | 0.1012                                                        | 0.1021                                                        |
| R <sub>1</sub> (all data)                  | 0.1060                                                        | 0.0967                                                        | 0.0933                                                        |
| wR(F <sup>2</sup> ) (all data)             | 0.0877                                                        | 0.1209                                                        | 0.1213                                                        |
| Goodness-of-fit                            | 0.800                                                         | 1.011                                                         | 1.015                                                         |
| CCDC deposition number                     | 1859283                                                       | 1859282                                                       | 1859281                                                       |

|                                            |                                                               |                                                               |                                                               |
|--------------------------------------------|---------------------------------------------------------------|---------------------------------------------------------------|---------------------------------------------------------------|
| compound formula                           | C <sub>36</sub> H <sub>32</sub> N <sub>4</sub> O <sub>4</sub> | C <sub>36</sub> H <sub>32</sub> N <sub>4</sub> O <sub>4</sub> | C <sub>36</sub> H <sub>32</sub> N <sub>4</sub> O <sub>4</sub> |
| formula mass                               | 584.65                                                        | 584.65                                                        | 584.65                                                        |
| crystal system                             | monoclinic                                                    | monoclinic                                                    | monoclinic                                                    |
| space group                                | P2 <sub>1</sub> /n                                            | P2 <sub>1</sub> /n                                            | P2 <sub>1</sub> /n                                            |
| a/Å                                        | 11.3216(8)                                                    | 11.3155(9)                                                    | 11.3235(6)                                                    |
| b/Å                                        | 9.7698(4)                                                     | 9.7527(5)                                                     | 9.7491(3)                                                     |
| c/Å                                        | 14.2672(10)                                                   | 14.2477(11)                                                   | 14.2452(8)                                                    |
| α/°                                        | 90                                                            | 90                                                            | 90                                                            |
| β/°                                        | 111.713(3)                                                    | 111.746(3)                                                    | 111.822(2)                                                    |
| γ/°                                        | 90                                                            | 90                                                            | 90                                                            |
| V/Å <sup>3</sup>                           | 1466.12(16)                                                   | 1460.43(18)                                                   | 1459.90(12)                                                   |
| ρ <sub>calc</sub> /g cm <sup>-3</sup>      | 1.324                                                         | 1.330                                                         | 1.330                                                         |
| T/K                                        | 230                                                           | 210                                                           | 190                                                           |
| Z                                          | 2                                                             | 2                                                             | 2                                                             |
| radiation type                             | Mo Kα                                                         | Mo Kα                                                         | Mo Kα                                                         |
| absorption coefficient, μ/mm <sup>-1</sup> | 0.088                                                         | 0.088                                                         | 0.088                                                         |
| no. of reflections measured                | 7748                                                          | 7750                                                          | 7726                                                          |
| no. of independent reflections             | 3372                                                          | 3364                                                          | 3356                                                          |
| no of reflection (I > 2σ(I))               | 2135                                                          | 2225                                                          | 2300                                                          |
| R <sub>int</sub>                           | 0.0362                                                        | 0.0384                                                        | 0.0371                                                        |
| R <sub>1</sub> (I > 2σ(I))                 | 0.0461                                                        | 0.0462                                                        | 0.0463                                                        |
| wR(F <sup>2</sup> ) (I > 2σ(I))            | 0.0978                                                        | 0.0979                                                        | 0.0992                                                        |
| R <sub>1</sub> (all data)                  | 0.0874                                                        | 0.0809                                                        | 0.0780                                                        |
| wR(F <sup>2</sup> ) (all data)             | 0.1174                                                        | 0.1136                                                        | 0.1150                                                        |
| Goodness-of-fit                            | 1.006                                                         | 1.016                                                         | 1.009                                                         |
| CCDC deposition number                     | 1859280                                                       | 1859279                                                       | 1859278                                                       |

#### 4. Thermal Expansion Data and Intermolecular Interaction Distances

The thermal expansion coefficients were calculated using the PASCAL program.<sup>5</sup> The crystallographic data sets were collected at 290, 270, 250, 230, 210, and 190 K and used for the thermal expansion calculations.

**Table S2.** Thermal expansion coefficients for the co-crystal 2(res)•(TPCB). Errors denoted in parentheses and approximate crystallographic axis denoted in brackets.

| Co-crystal    | $\alpha_{x_1}$ (MK <sup>-1</sup> )<br>[axis] | $\alpha_{x_2}$ (MK <sup>-1</sup> )<br>[axis] | $\alpha_{x_3}$ (MK <sup>-1</sup> )<br>[axis] | $\alpha_V$ (MK <sup>-1</sup> ) |
|---------------|----------------------------------------------|----------------------------------------------|----------------------------------------------|--------------------------------|
| 2(res)•(TPCB) | -12(2)<br>[4 0 -1]                           | 56(3)<br>[0 1 0]                             | 56(1)<br>[1 0 1]                             | 104(7)                         |

**Table S3.** Intermolecular interaction distances that contribute to the thermal expansion parameters.

| Co-crystal                                 | O-H···N hydrogen bond (Å)<br>290 K         | O-H···N hydrogen bond (Å)<br>190 K  | Change (Å) |
|--------------------------------------------|--------------------------------------------|-------------------------------------|------------|
| 2(res)•(TPCB)                              | 2.7207                                     | 2.7125                              | 0.0082     |
|                                            | 2.7839                                     | 2.7840                              | -0.0001    |
|                                            |                                            |                                     |            |
|                                            | C-H···O hydrogen bond (Å)<br>290 K         | C-H···O hydrogen bond (Å)<br>190 K  | Change (Å) |
|                                            | 3.325                                      | 3.292                               | 0.033      |
|                                            | 3.329                                      | 3.273                               | 0.056      |
|                                            | 3.510                                      | 3.471                               | 0.039      |
|                                            |                                            |                                     |            |
|                                            | C-H··· $\pi$ distances (Å)<br>290 K        | C-H··· $\pi$ distances (Å)<br>190 K | Change (Å) |
|                                            | 3.566                                      | 3.544                               | 0.022      |
|                                            | 3.735                                      | 3.714                               | 0.021      |
|                                            | 3.679                                      | 3.651                               | 0.028      |
| 3.817                                      | 3.790                                      | 0.027                               |            |
|                                            |                                            |                                     |            |
| C-H(pyr)···C-H(pyr) distances (Å)<br>290 K | C-H(pyr)···C-H(pyr) distances (Å)<br>190 K | Change (Å)                          |            |
| 3.883                                      | 3.848                                      | 0.035                               |            |

## References

1. L. R. MacGillivray, J. L. Reid and J. A. Ripmeester, *J. Am. Chem. Soc.*, 2000, **122**, 7817.
2. Krause *et al.*, (2015) SADABS v 2016/2.
3. G. M. Sheldrick, *Acta Crystallogr.*, 2015, **C71**, 3.
4. K. M. Hutchins, D. K. Unruh, F. A. Verdu and R. H. Groeneman, *Cryst. Growth Des.*, 2018, **18**, 566.
5. M. J. Cliffe and A. L. Goodwin, *J. Appl. Crystallogr.*, 2012, **45**, 1321.
